# Supplementary material
Source: publisher figshare collection journal article supplement (https://asha.figshare.com/articles/dataset/_/23787033)
Supplement: Supplementary file 2 [file 1]

### Supplemental Material S3. Elicitations for ALS sentences dataset.

The table below provides the sentence elicitations used in the sentence reading task for the 340 recording, 38 minute *ALS Sentence Reading* corpus, the dataset used to fine-tune the acoustic model. Similar to the DDK recordings, the speech was collected using the SpeechVitals™ app. Note that some speakers did not recite all five sentences.

Five sentence prompts were provided to speakers for sentence reading task.

A dataset of ALS speakers performing a sentence reading task was used to fine-tune the

|   | Sentence                                                         |
|---|------------------------------------------------------------------|
| 1 | The supermarket chain shut down because of poor management.      |
| 2 | Much more money must be donated to make this department succeed. |
| 3 | In this famous coffee shop, they serve the best donuts in town.  |
| 4 | The chairman decided to pave over the shopping center garden.    |
| 5 | The standards committee met this afternoon in an open meeting.   |
