# Supplementary material
Source: publisher figshare collection journal article supplement (https://asha.figshare.com/articles/dataset/_/23787033)
Supplement: Supplementary file 4 [file 1]

**Supplemental Material S1.** Description of DDK Corpus 2.

| <b>DDK Corpus 2 - 884 total recordings</b> |                        |                                                                             |                                      |
|--------------------------------------------|------------------------|-----------------------------------------------------------------------------|--------------------------------------|
| <b>Recordings Subsets</b>                  | <b>Number of Files</b> | <b>Study Source</b>                                                         | <b>Dysarthria Severity Range</b>     |
| <b><i>All ALS Recordings</i></b>           | <b><i>754</i></b>      | <b><i>1. ALS-at-home</i></b><br><b><i>2. Same study as DDK Corpus 1</i></b> | <b><i>Mild, Moderate, Severe</i></b> |
| DDK Assessments from ALS Speakers          | 130                    | Same Study as <i>DDK Corpus 1</i>                                           | Mild, Moderate, Severe               |
| DDK Assessments with ALSFRS-r speech = 4   | 93                     | ALS-at-home                                                                 | Mild                                 |
| DDK Assessments with ALSFRS-r speech = 3   | 548                    | ALS-at-home                                                                 | Mild, Moderate                       |
| DDK Assessments with ALSFRS-r speech = 2   | 8                      | ALS-at-home                                                                 | Severe                               |
| DDK Assessments with ALSFRS-r speech = 1   | 4                      | ALS-at-home                                                                 | Severe                               |
| <b><i>All Healthy Recordings</i></b>       | <b><i>101</i></b>      | <b><i>ALS-at-home</i></b>                                                   | <b><i>Healthy</i></b>                |
