# Supplementary material
Source: publisher figshare collection journal article supplement (https://asha.figshare.com/articles/dataset/_/23787033)

## Supplemental Material S2. The three-stage model of speech generation.

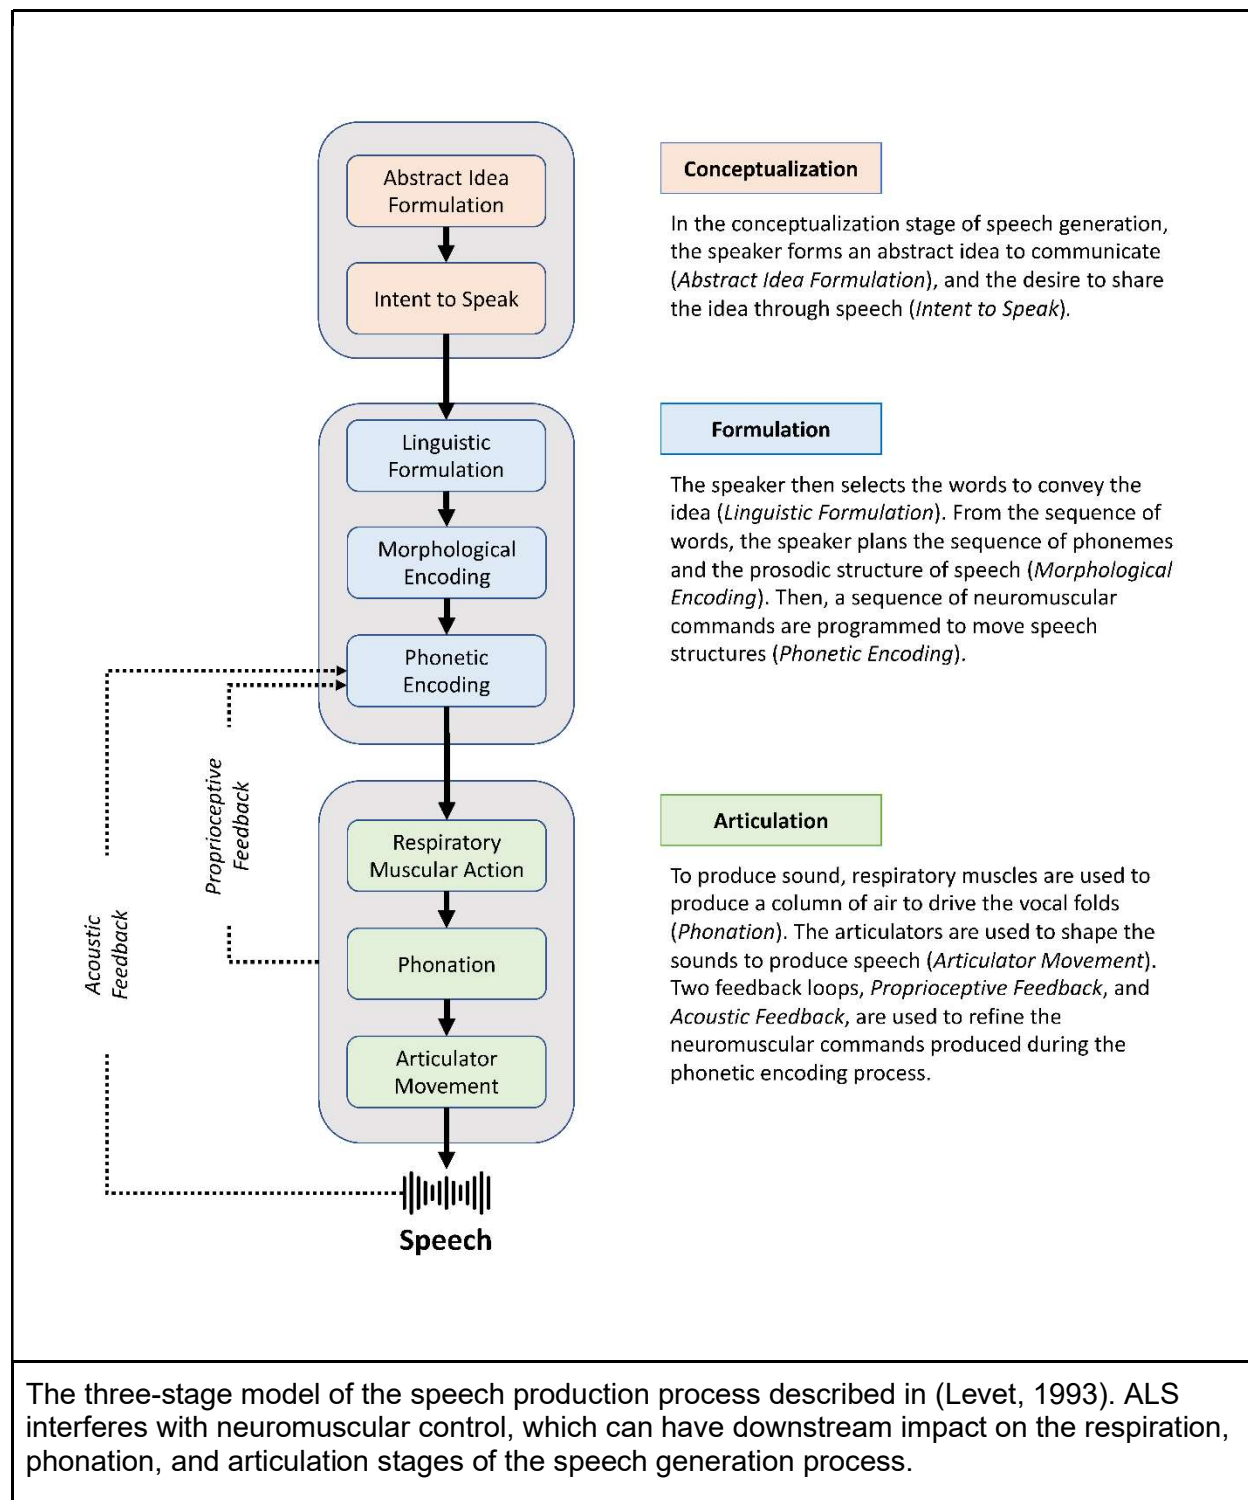

Supplement: Supplementary file 3 [file 1]
